# Supplementary material
Source: MDPI journal article supplement (https://www.mdpi.com/2073-4441/13/7/882)
Supplement: s1 [file s1]

## Article

# Title A Framework Based on Finite Element Method (FEM) for Modelling and Assessing the Affection of the Local Thermal Weather Factors on the Performance of Anaerobic Lagoons for the Natural Treatment of Swine Wastewater

Saulo Brito-Espino <sup>\*,†</sup>, Alejandro Ramos-Martín <sup>†</sup>, Sebastian O. Pérez-Báez <sup>†</sup>, Carlos Mendieta-Pino <sup>†</sup> and Federico Leon-Zerpa <sup>†</sup>

<sup>1</sup> Department of Process Engineering, Institute for Environmental Studies and Natural Resources (i-UNAT)(ULPGC), University of Las Palmas de Gran Canaria (ULPGC), 35017 Las Palmas, Spain. alejandro.ramos@ulpgc.es (A.R.-M.); sebastianovidio.perez@ulpgc.es (S.O.P.-B.); carlos.mendieta@ulpgc.es (C.M.-P.); federico.leon@ulpgc.es (F.L.-Z.)

\* Correspondence: saulo.brito101@alu.ulpgc.es

<sup>†</sup> These authors contributed equally to this work.

**Citation:** Brito-Espino, S.; Ramos-Martín, A.; Pérez-Báez, S.O.; Mendieta-Pino, C.; Leon-Zerpa, F. A Framework Based on Finite Element Method (FEM) for Modelling and Assessing the Affection of the Local Thermal Weather Factors on the Performance of Anaerobic Lagoons for the Natural Treatment of Swine Wastewater. *Water* **2021**, *13*, 882. <https://doi.org/10.3390/w13070882>

Academic Editor: Bing-Jie Ni

Received: 1 February 2021

Accepted: 11 March 2021

Published: 24 March 2021

**Publisher's Note:** MDPI stays neutral with regard to jurisdictional claims in published maps and institutional affiliations.

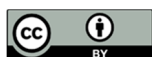

**Copyright:** © 2020 by the authors. Submitted for possible open access publication under the terms and conditions of the Creative Commons Attribution (CC BY) license (<http://creativecommons.org/licenses/by/4.0/>).

Table S1 Biochemical rate coefficients ( $v_i$ ) and kinetic rate equations ( $\rho_i$ ) for soluble components ( $i=1-12$ ;  $j=1-19$ ). The matrix comes from the ADM1 Bastone et al. [2]

| Component → | i                           | 1                                           | 2                                       | 3                                                  | 4                                          | 5                                          | 6                                            | 7                                         | 8                                        | 9                                       | 10                                            | 11                                              | 12                                         | Rate ( $\rho_i$ kgCOD m <sup>-3</sup> · d <sup>-1</sup> )                                                                           |
|-------------|-----------------------------|---------------------------------------------|-----------------------------------------|----------------------------------------------------|--------------------------------------------|--------------------------------------------|----------------------------------------------|-------------------------------------------|------------------------------------------|-----------------------------------------|-----------------------------------------------|-------------------------------------------------|--------------------------------------------|-------------------------------------------------------------------------------------------------------------------------------------|
| j           | Process                     | $S_{su}$                                    | $S_{aa}$                                | $S_{fa}$                                           | $S_{va}$                                   | $S_{bu}$                                   | $S_{pro}$                                    | $S_{ac}$                                  | $S_{h_2}$                                | $S_{ch_4}$                              | $S_{ic}$                                      | $S_{in}$                                        | $S_i$                                      |                                                                                                                                     |
| 1           | Disintegration              |                                             |                                         |                                                    |                                            |                                            |                                              |                                           |                                          |                                         |                                               |                                                 | $f_{sl,xc}$                                | $k_{dis}X_c$                                                                                                                        |
| 2           | Hydrolysis of carbohydrates | 1                                           |                                         |                                                    |                                            |                                            |                                              |                                           |                                          |                                         |                                               |                                                 |                                            | $k_{hyd,ch}X_{ch}$                                                                                                                  |
| 3           | Hydrolysis of proteins      |                                             | 1                                       |                                                    |                                            |                                            |                                              |                                           |                                          |                                         |                                               |                                                 |                                            | $k_{hyd,pr}X_{pr}$                                                                                                                  |
| 4           | Hydrolysis of lipids        | $1 - f_{fa,li}$                             |                                         | $f_{fa,li}$                                        |                                            |                                            |                                              |                                           |                                          |                                         |                                               |                                                 |                                            | $k_{hyd,li}X_{li}$                                                                                                                  |
| 5           | Uptake of sugar             | -1                                          |                                         |                                                    |                                            | $(1 - Y_{su})f_{bu,su}$                    | $(1 - Y_{su})f_{pro,su}$                     | $(1 - Y_{su})f_{ac,su}$                   | $(1 - Y_{su})f_{h_2,su}$                 |                                         | $-\sum_{i=1-9}^{11-29} C_i v_{i,5}$           | $-(Y_{su})N_{bac}$                              |                                            | $k_{m,su} \frac{S_{su}}{K_s + S_{su}} X_{su} I_1$                                                                                   |
| 6           | Uptake of amino acids       |                                             | -1                                      |                                                    | $(1 - Y_{aa})f_{va,aa}$                    | $(1 - Y_{aa})f_{bu,aa}$                    | $(1 - Y_{aa})f_{pro,aa}$                     | $(1 - Y_{aa})f_{ac,aa}$                   | $(1 - Y_{aa})f_{h_2,aa}$                 |                                         | $-\sum_{i=1-9}^{11-29} C_i v_{i,6}$           | $N_{aa} - (Y_{aa})N_{bac}$                      |                                            | $k_{m,aa} \frac{S_{aa}}{K_s + S_{aa}} X_{aa} I_1$                                                                                   |
| 7           | Uptake of LCFA              |                                             |                                         | -1                                                 |                                            |                                            |                                              | $(1 - Y_{fa})0.7$                         | $(1 - Y_{fa})0.3$                        |                                         |                                               | $-(Y_{fa})N_{bac}$                              |                                            | $k_{m,fa} \frac{S_{fa}}{K_s + S_{fa}} X_{fa} I_2$                                                                                   |
| 8           | Uptake of valerate          |                                             |                                         |                                                    | -1                                         |                                            | $(1 - Y_{c4})0.54$                           | $(1 - Y_{c4})0.31$                        | $(1 - Y_{c4})0.15$                       |                                         |                                               | $-(Y_{c4})N_{bac}$                              |                                            | $k_{m,c4} \frac{S_{va}}{K_s + S_{va}} X_{c4} I_1 + \frac{1}{S_{bu}/S_{va}} I$                                                       |
| 9           | Uptake of butyrate          |                                             |                                         |                                                    |                                            | -1                                         |                                              | $(1 - Y_{c4})0.8$                         | $(1 - Y_{c4})0.2$                        |                                         |                                               | $-(Y_{c4})N_{bac}$                              |                                            | $k_{m,c4} \frac{S_{bu}}{K_s + S_{bu}} X_{c4} I_1 + \frac{1}{S_{va}/S_{bu}} I$                                                       |
| 10          | Uptake of propionate        |                                             |                                         |                                                    |                                            |                                            | -1                                           | $(1 - Y_{pro})0.57$                       | $(1 - Y_{pro})0.43$                      |                                         | $-\sum_{i=1-9}^{11-29} C_i v_{i,10}$          | $-(Y_{pro})N_{bac}$                             |                                            | $k_{m,pr} \frac{S_{pro}}{K_s + S_{pro}} X_{pro} I_2$                                                                                |
| 11          | Uptake of acetate           |                                             |                                         |                                                    |                                            |                                            |                                              | -1                                        |                                          | $(1 - Y_{ac})$                          | $-\sum_{i=1-9}^{11-29} C_i v_{i,11}$          | $-(Y_{ac})N_{bac}$                              |                                            | $k_{m,ac} \frac{S_{ac}}{K_s + S_{ac}} X_{ac} I_3$                                                                                   |
| 12          | Uptake of hydrogen          |                                             |                                         |                                                    |                                            |                                            |                                              |                                           | -1                                       | $(1 - Y_{h_2})$                         | $-\sum_{i=1-9}^{11-29} C_i v_{i,12}$          | $-(Y_{h_2})N_{bac}$                             |                                            | $k_{m,h_2} \frac{S_{h_2}}{K_s + S_{h_2}} X_{h_2} I_1$                                                                               |
| 13          | Decay of $X_{su}$           |                                             |                                         |                                                    |                                            |                                            |                                              |                                           |                                          |                                         |                                               |                                                 |                                            | $k_{dec,X_{su}} X_{su}$                                                                                                             |
| 14          | Decay of $X_{aa}$           |                                             |                                         |                                                    |                                            |                                            |                                              |                                           |                                          |                                         |                                               |                                                 |                                            | $k_{dec,X_{aa}} X_{aa}$                                                                                                             |
| 15          | Decay of $X_{fa}$           |                                             |                                         |                                                    |                                            |                                            |                                              |                                           |                                          |                                         |                                               |                                                 |                                            | $k_{dec,X_{fa}} X_{fa}$                                                                                                             |
| 16          | Decay of $X_{c4}$           |                                             |                                         |                                                    |                                            |                                            |                                              |                                           |                                          |                                         |                                               |                                                 |                                            | $k_{dec,X_{c4}} X_{c4}$                                                                                                             |
| 17          | Decay of $X_{pro}$          |                                             |                                         |                                                    |                                            |                                            |                                              |                                           |                                          |                                         |                                               |                                                 |                                            | $k_{dec,X_{pro}} X_{pro}$                                                                                                           |
| 18          | Decay of $X_{ac}$           |                                             |                                         |                                                    |                                            |                                            |                                              |                                           |                                          |                                         |                                               |                                                 |                                            | $k_{dec,X_{ac}} X_{ac}$                                                                                                             |
| 19          | Decay of $X_{h_2}$          |                                             |                                         |                                                    |                                            |                                            |                                              |                                           |                                          |                                         |                                               |                                                 |                                            | $k_{dec,X_{h_2}} X_{h_2}$                                                                                                           |
|             |                             | Monosaccharides<br>(kgCOD m <sup>-3</sup> ) | Amino acids<br>(kgCOD m <sup>-3</sup> ) | Long chain fatty acids<br>(kgCOD m <sup>-3</sup> ) | Total valerate<br>(kgCOD m <sup>-3</sup> ) | Total butyrate<br>(kgCOD m <sup>-3</sup> ) | Total propionate<br>(kgCOD m <sup>-3</sup> ) | Total acetate<br>(kgCOD m <sup>-3</sup> ) | Hydrogen gas<br>(kgCOD m <sup>-3</sup> ) | Methane gas<br>(kgCOD m <sup>-3</sup> ) | Inorganic carbon<br>(kmoleC m <sup>-3</sup> ) | Inorganic nitrogen<br>(kmoleN m <sup>-3</sup> ) | Soluble inerts<br>(kgCOD m <sup>-3</sup> ) | Inhibition factors:<br>$I_1 = I_{pH} I_{N,lim} I_{h_2}$<br>$I_1 = I_{pH} I_{N,lim} I_{h_2}$<br>$I_1 = I_{pH} I_{N,lim} I_{NH_3,ac}$ |

Table S2 Biochemical rate coefficients ( $v_{i,j}$ ) and kinetic rate equations ( $p_i$ ) for particulate components ( $i=13-24$ ;  $j=1-19$ ). The matrix comes from the ADM1 Bastone et al. [2]

| Component → |                             | i | 13                                      | 14                                         | 15                                    | 16                                  | 17                                           | 18                                                | 19                                          | 20                                                              | 21                                                | 22                                             | 23                                              | 24                                              | 36                                         | 37                                                                  | 38                                                               | 39                                        | Rate ( $p_i$ kg COD m <sup>-3</sup> · d <sup>-1</sup> )                                                                    |
|-------------|-----------------------------|---|-----------------------------------------|--------------------------------------------|---------------------------------------|-------------------------------------|----------------------------------------------|---------------------------------------------------|---------------------------------------------|-----------------------------------------------------------------|---------------------------------------------------|------------------------------------------------|-------------------------------------------------|-------------------------------------------------|--------------------------------------------|---------------------------------------------------------------------|------------------------------------------------------------------|-------------------------------------------|----------------------------------------------------------------------------------------------------------------------------|
| j           | Process <sub>j</sub>        |   | $X_c$                                   | $X_{ch}$                                   | $X_{pr}$                              | $X_{li}$                            | $X_{su}$                                     | $X_{aa}$                                          | $X_{fa}$                                    | $X_{c4}$                                                        | $X_{pro}$                                         | $X_{ac}$                                       | $X_{h2}$                                        | $X_l$                                           | $S_{lac}$                                  | $X_{lac,f}$                                                         | $X_{lac,o}$                                                      | $S_{ca}$                                  |                                                                                                                            |
| 1           | Disintegration              |   | -1                                      | $f_{ch,xc}$                                | $f_{pr,xc}$                           | $f_{li,xc}$                         |                                              |                                                   |                                             |                                                                 |                                                   |                                                |                                                 | $f_{xl,xc}$                                     |                                            |                                                                     |                                                                  |                                           | $k_{dis} X_c$                                                                                                              |
| 2           | Hydrolysis of carbohydrates |   |                                         | -1                                         |                                       |                                     |                                              |                                                   |                                             |                                                                 |                                                   |                                                |                                                 |                                                 |                                            |                                                                     |                                                                  |                                           | $k_{hyd,ch} X_{ch}$                                                                                                        |
| 3           | Hydrolysis of proteins      |   |                                         |                                            | -1                                    |                                     |                                              |                                                   |                                             |                                                                 |                                                   |                                                |                                                 |                                                 |                                            |                                                                     |                                                                  |                                           | $k_{hyd,pr} X_{pr}$                                                                                                        |
| 4           | Hydrolysis of lipids        |   |                                         |                                            |                                       | -1                                  |                                              |                                                   |                                             |                                                                 |                                                   |                                                |                                                 |                                                 |                                            |                                                                     |                                                                  |                                           | $k_{hyd,li} X_{li}$                                                                                                        |
| 5           | Uptake of sugar             |   |                                         |                                            |                                       |                                     | $Y_{su}$                                     |                                                   |                                             |                                                                 |                                                   |                                                |                                                 |                                                 |                                            |                                                                     |                                                                  |                                           | $k_{m,su} \frac{S_{su}}{K_s + S_{su}} X_{su} I_1$                                                                          |
| 6           | Uptake of amino acids       |   |                                         |                                            |                                       |                                     |                                              | $Y_{aa}$                                          |                                             |                                                                 |                                                   |                                                |                                                 |                                                 |                                            |                                                                     |                                                                  |                                           | $k_{m,aa} \frac{S_{aa}}{K_s + S_{aa}} X_{aa} I_1$                                                                          |
| 7           | Uptake of LCFA              |   |                                         |                                            |                                       |                                     |                                              |                                                   | $Y_{fa}$                                    |                                                                 |                                                   |                                                |                                                 |                                                 |                                            |                                                                     |                                                                  |                                           | $k_{m,fa} \frac{S_{fa}}{K_s + S_{fa}} X_{fa} I_2$                                                                          |
| 8           | Uptake of valerate          |   |                                         |                                            |                                       |                                     |                                              |                                                   |                                             | $Y_{c4}$                                                        |                                                   |                                                |                                                 |                                                 |                                            |                                                                     |                                                                  |                                           | $k_{m,c4} \frac{S_{va}}{K_s + S_{va}} X_{c4} \frac{1}{1 + S_{hu}/S_{va}}$                                                  |
| 9           | Uptake of butyrate          |   |                                         |                                            |                                       |                                     |                                              |                                                   |                                             | $Y_{c4}$                                                        |                                                   |                                                |                                                 |                                                 |                                            |                                                                     |                                                                  |                                           | $k_{m,c4} \frac{S_{bu}}{K_s + S_{bu}} X_{c4} \frac{1}{1 + S_{hu}/S_{bu}}$                                                  |
| 10          | Uptake of propionate        |   |                                         |                                            |                                       |                                     |                                              |                                                   |                                             |                                                                 | $Y_{pro}$                                         |                                                |                                                 |                                                 |                                            |                                                                     |                                                                  |                                           | $k_{m,pr} \frac{S_{pro}}{K_s + S_{pro}} X_{pro} I_2$                                                                       |
| 11          | Uptake of acetate           |   |                                         |                                            |                                       |                                     |                                              |                                                   |                                             |                                                                 |                                                   | $Y_{ac}$                                       |                                                 |                                                 |                                            |                                                                     |                                                                  |                                           | $k_{m,ac} \frac{S_{ac}}{K_s + S_{ac}} X_{ac} I_3$                                                                          |
| 12          | Uptake of hydrogen          |   |                                         |                                            |                                       |                                     |                                              |                                                   |                                             |                                                                 |                                                   |                                                | $Y_{h2}$                                        |                                                 |                                            |                                                                     |                                                                  |                                           | $k_{m,h2} \frac{S_{h2}}{K_s + S_{h2}} X_{h2} I_1$                                                                          |
| 13          | Decay of $X_{su}$           |   | 1                                       |                                            |                                       |                                     | -1                                           |                                                   |                                             |                                                                 |                                                   |                                                |                                                 |                                                 |                                            |                                                                     |                                                                  |                                           | $k_{dec,Xsu} X_{su}$                                                                                                       |
| 14          | Decay of $X_{aa}$           |   | 1                                       |                                            |                                       |                                     |                                              | -1                                                |                                             |                                                                 |                                                   |                                                |                                                 |                                                 |                                            |                                                                     |                                                                  |                                           | $k_{dec,Xaa} X_{aa}$                                                                                                       |
| 15          | Decay of $X_{fa}$           |   | 1                                       |                                            |                                       |                                     |                                              |                                                   | -1                                          |                                                                 |                                                   |                                                |                                                 |                                                 |                                            |                                                                     |                                                                  |                                           | $k_{dec,Xfa} X_{fa}$                                                                                                       |
| 16          | Decay of $X_{c4}$           |   | 1                                       |                                            |                                       |                                     |                                              |                                                   |                                             | -1                                                              |                                                   |                                                |                                                 |                                                 |                                            |                                                                     |                                                                  |                                           | $k_{dec,Xc4} X_{c4}$                                                                                                       |
| 17          | Decay of $X_{pro}$          |   | 1                                       |                                            |                                       |                                     |                                              |                                                   |                                             |                                                                 | -1                                                |                                                |                                                 |                                                 |                                            |                                                                     |                                                                  |                                           | $k_{dec,Xpro} X_{pro}$                                                                                                     |
| 18          | Decay of $X_{ac}$           |   | 1                                       |                                            |                                       |                                     |                                              |                                                   |                                             |                                                                 |                                                   | -1                                             |                                                 |                                                 |                                            |                                                                     |                                                                  |                                           | $k_{dec,Xac} X_{ac}$                                                                                                       |
| 19          | Decay of $X_{h2}$           |   | 1                                       |                                            |                                       |                                     |                                              |                                                   |                                             |                                                                 |                                                   |                                                | -1                                              |                                                 |                                            |                                                                     |                                                                  |                                           | $k_{dec,Xh2} X_{h2}$                                                                                                       |
|             |                             |   | Composites<br>(kg COD m <sup>-3</sup> ) | Carbohydrates<br>(kg COD m <sup>-3</sup> ) | Proteins<br>(kg COD m <sup>-3</sup> ) | Lipids<br>(kg COD m <sup>-3</sup> ) | Sugar degraders<br>(kg COD m <sup>-3</sup> ) | Amino acid degraders<br>(kg COD m <sup>-3</sup> ) | LCFA degraders<br>(kg COD m <sup>-3</sup> ) | Valerate and butyrate<br>degraders<br>(kg COD m <sup>-3</sup> ) | Propionate degraders<br>(kg COD m <sup>-3</sup> ) | Acetate degraders<br>(kg COD m <sup>-3</sup> ) | Hydrogen degraders<br>(kg COD m <sup>-3</sup> ) | Particulate inerts<br>(kg COD m <sup>-3</sup> ) | Total lactate<br>(kg COD m <sup>-3</sup> ) | Lactate<br>(fermentation)<br>degraders<br>(kg COD m <sup>-3</sup> ) | Lactate<br>(oxidation)<br>degraders<br>(kg COD m <sup>-3</sup> ) | Total calcium<br>(mmole m <sup>-3</sup> ) | Inhibition factors:<br>$I_1 = I_{pH} I_{in,im}$<br>$I_1 = I_{pH} I_{in,im} I_{h2}$<br>$I_1 = I_{pH} I_{in,im} I_{NH3,Xac}$ |

**Table S3.** Dynamic state variables included in the stoichiometry matrix (Tables A1 and A2).

| Name     | Description        | Name        | Description        |
|----------|--------------------|-------------|--------------------|
| $X_c$    | composite          | $S_{bu}$    | total butyrate     |
| $X_{ch}$ | carbohydrates      | $S_{pro}$   | total propionate   |
| $X_{pr}$ | proteins           | $S_{ac}$    | total acetate      |
| $X_u$    | lipids             | $S_{h2}$    | hydrogen           |
| $X_l$    | particulate inerts | $S_{ch4}$   | methane            |
| $S_l$    | soluble inerts     | $S_{ic}$    | inorganic carbon   |
| $S_{su}$ | monosacharides     | $S_{IN}$    | inorganic nitrogen |
| $S_{aa}$ | amino acids        | $X_{su-h2}$ | biomass            |
| $S_{ta}$ | total LCFA         | $S_{cat}$   | cations            |
| $S_{va}$ | total valerate     | $S_{an}$    | anions             |
